# Supplementary material for: Effect of Multi-Phosphonate Coating of Titanium Surfaces on Osteogenic Potential
Source: MDPI journal article supplement (doi:10.3390/ma13245777), 2020-12-17
Supplement: s1 [file s1]

Article

# Effect of Multi-Phosphonate Coating of Titanium Surfaces on Osteogenic Potential

Christian Wehner <sup>1</sup>, Christian Behm <sup>2,3</sup>, Selma Husejnagic <sup>1</sup>, Andreas Moritz <sup>1</sup>, Xiaohui Rausch-Fan <sup>1,2</sup> and Oleh Andrukhov <sup>2,\*</sup>

<sup>1</sup> Division of Conservative Dentistry and Periodontology, University Clinic of Dentistry, Medical University of Vienna, 1090 Vienna, Austria; christian.wehner@meduniwien.ac.at (C.W.); selma.husejnagic@meduniwien.ac.at (S.H.); andreas.moritz@meduniwien.ac.at (A.M.); xiaohui.rausch-fan@meduniwien.ac.at (X.R.-F.)

<sup>2</sup> Competence Center for Periodontal Research, University Clinic of Dentistry, Medical University of Vienna, 1090 Vienna, Austria; christian.behm@meduniwien.ac.at

<sup>3</sup> Division of Orthodontics, University Clinic of Dentistry, Medical University of Vienna, 1090 Vienna, Austria

\* Correspondence: oleh.andrukhov@meduniwien.ac.at; Tel.: +43-1-40070-2620

Received: 6 November 2020; Accepted: 15 December 2020; Published: 17 December 2020

## Supplementary Information

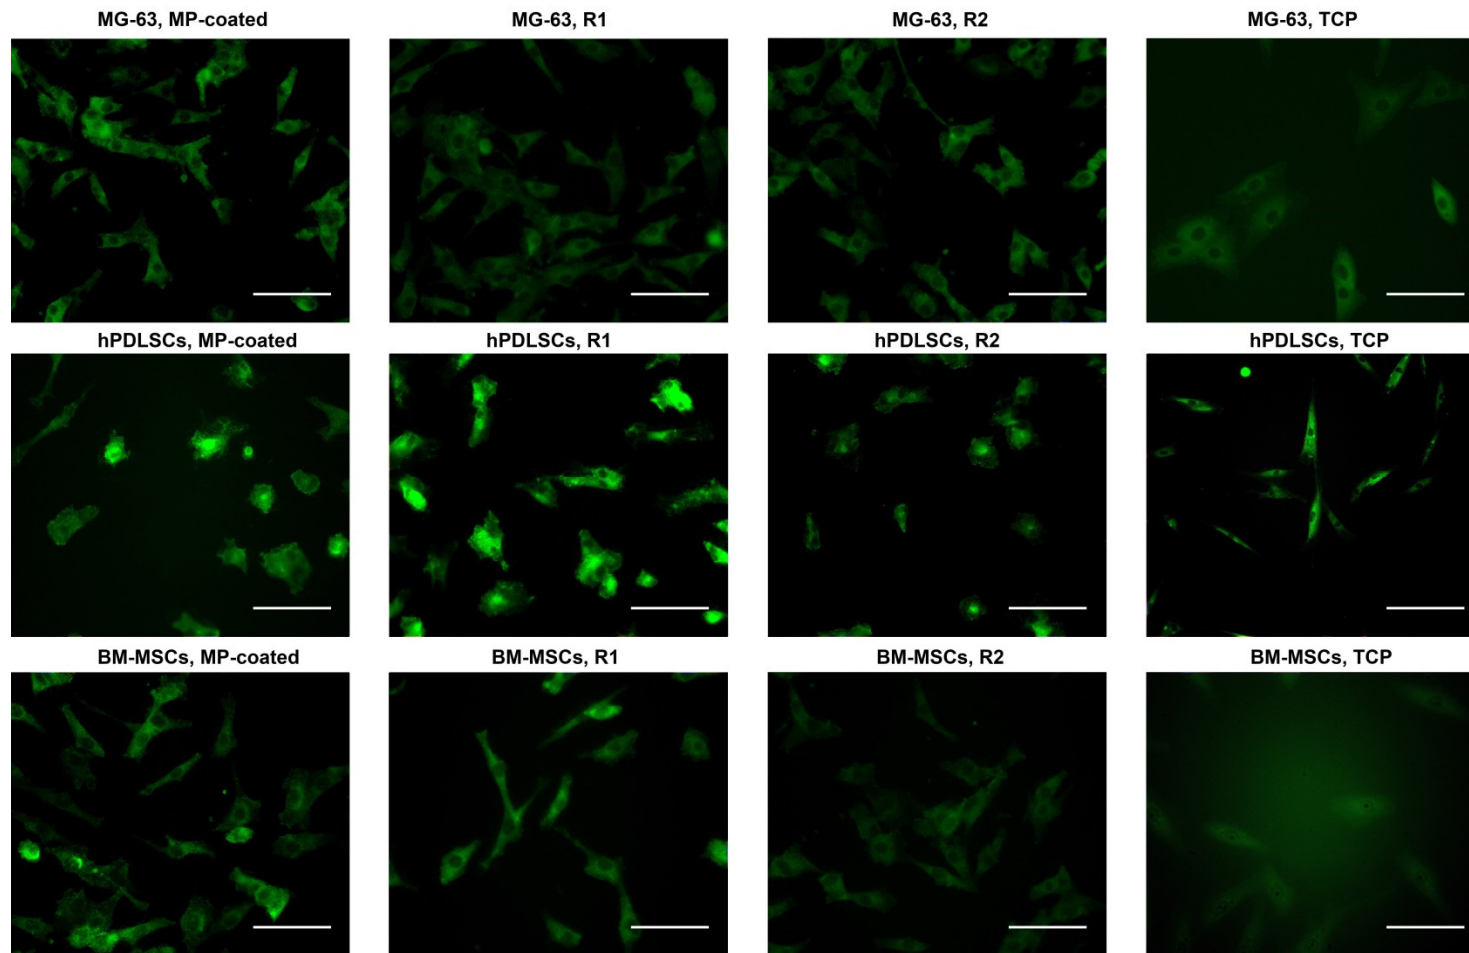

**Supplementary Figure S1.** Fluorescence microscopy analysis of focal adhesions in MG-63 cells, hPDLSCs, and BM-MSCs cultured on titanium surfaces and TCP.

Cell culture was performed on MP-coated as well as reference surfaces (R1, R2) and TCP as a control for 1 and 2 days; focal adhesions were stained with anti-Vinculin and counterstained with FITC (green). Scale bars correspond to 100 μm.

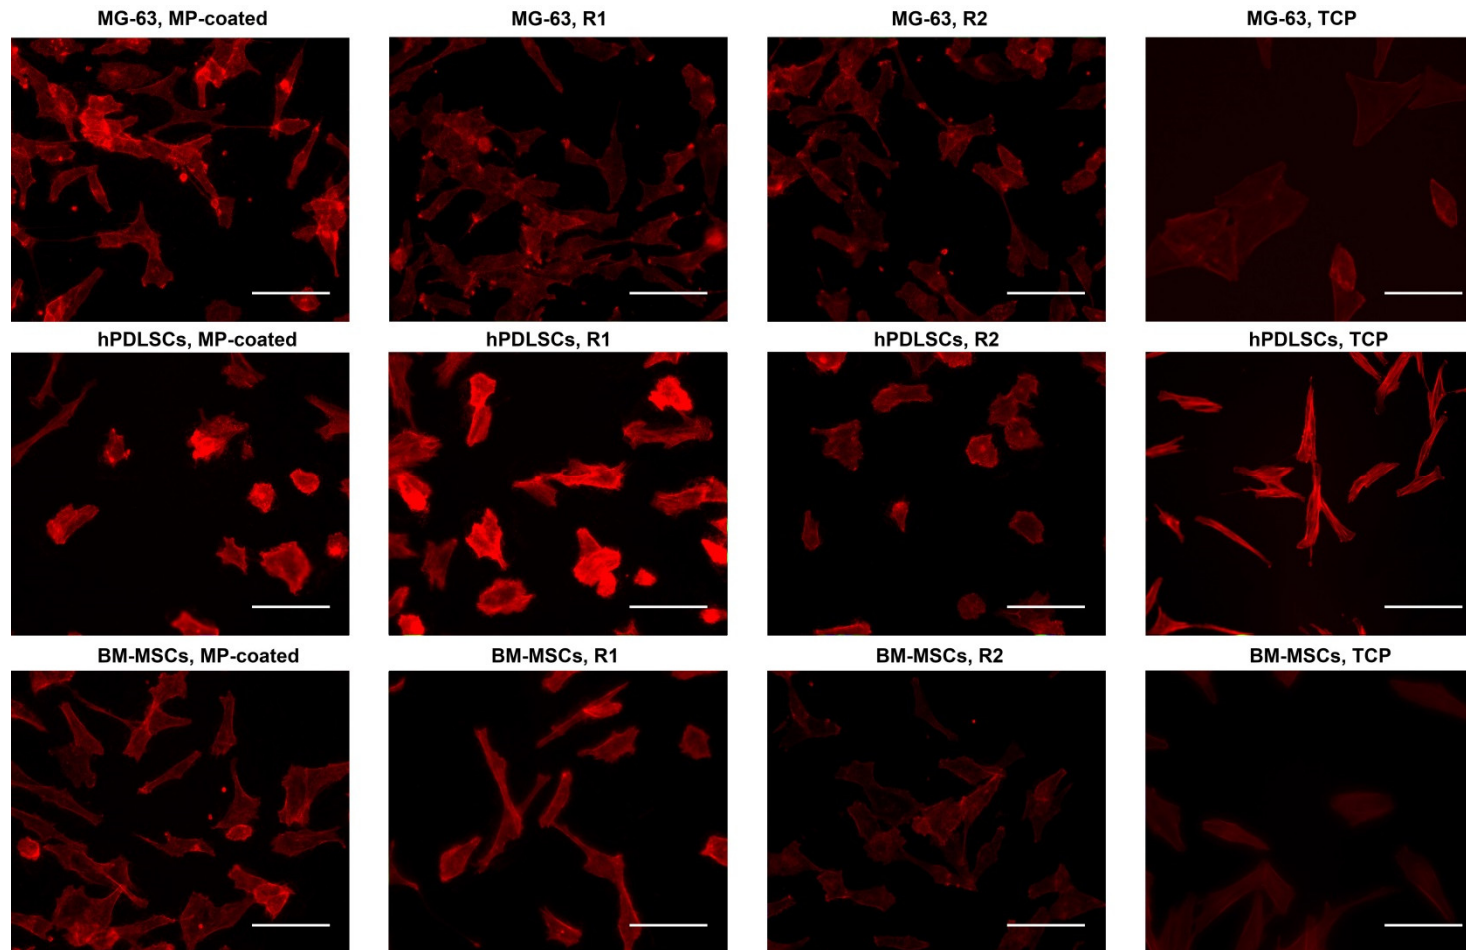

**Supplementary Figure S2.** Fluorescence microscopy analysis of F-actin in MG-63 cells, hPDLSCs, and BM-MSCs cultured on titanium surfaces and TCP.

Cell culture was performed on MP-coated as well as reference surfaces (R1, R2) and TCP as a control for 1 and 2 days; F-actin was stained with TRITC-conjugated Phalloidin (red). Scale bars correspond to 100 μm.

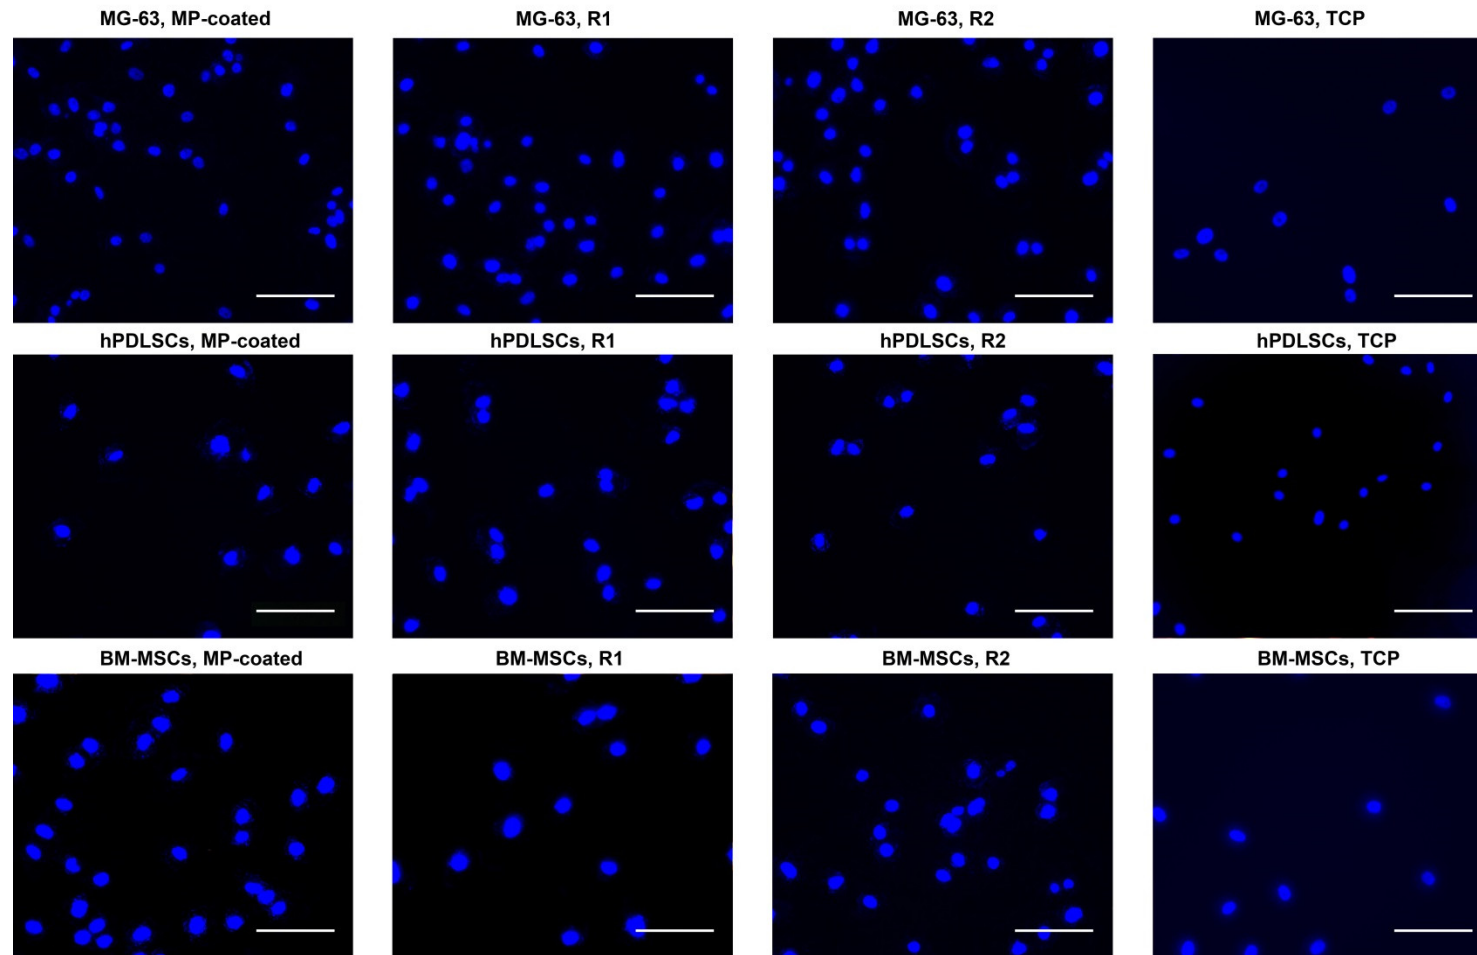

**Supplementary Figure S3.** Fluorescence microscopy analysis of nuclei in MG-63 cells, hPDLSCs, and BM-MSCs cultured on titanium surfaces and TCP.

Cell culture was performed on MP-coated as well as reference surfaces (R1, R2) and TCP as a control for 1 and 2 days; nuclei were stained with DAPI (blue). Scale bars correspond to 100 μm.

**Publisher's Note:** MDPI stays neutral with regard to jurisdictional claims in published maps and institutional affiliations.

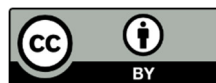

© 2020 by the authors. Licensee MDPI, Basel, Switzerland. This article is an open access article distributed under the terms and conditions of the Creative Commons Attribution (CC BY) license (<http://creativecommons.org/licenses/by/4.0/>).
